# Supplementary material for: Alternative radiopacifiers for polymethyl methacrylate bone cements: Silane-treated anatase titanium dioxide and yttria-stabilised zirconium dioxide
Source: PubMed Central journal article supplement (PMC8058833; doi:10.1177/0885328220983797), 2021-02-11
Supplement: sj-pdf-1-jba-10.1177_0885328220983797.pdf [file sj-pdf-1-jba-10.1177_0885328220983797.pdf]

Supplementary materials

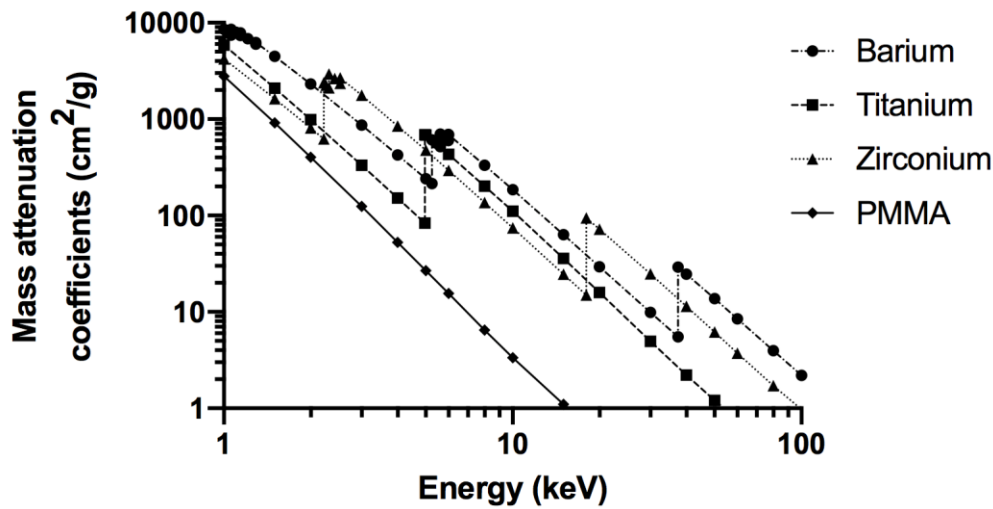

Fig. S1 Mass attenuation coefficients spectra for barium, titanium, zirconium and PMMA

Table S1 Average compressive strength, bending strength, bending modulus and fracture toughness values for tested cement compositions with standard deviations.

| Sample                         | Compressive strength (MPa)         | Bending strength (MPa)      | Bending Modulus (MPa)         | Critical stress intensity factor (MPam <sup>1/2</sup> ) |
|--------------------------------|------------------------------------|-----------------------------|-------------------------------|---------------------------------------------------------|
| 10%w/w BaSO <sub>4</sub>       | 95.5 ± 2.7                         | 53.8 ± 7.0                  | 3725.5 ± 318.7                | 1.5 ± 0.3                                               |
| 0%w/w radiopacifier            | 83.7 ± 2.4 <sup>+++</sup>          | 66.8 ± 3.6                  | 2991.5 ± 86.5                 | 1.9 ± 0.2                                               |
| 5%w/w TiO <sub>2</sub>         | 80.6 ± 1.0 <sup>+++</sup>          | 48.1 ± 4.3 <sup>**</sup>    | 2906.2 ± 78.5                 | 1.7 ± 0.2                                               |
| 10%w/w TiO <sub>2</sub>        | 86.4 ± 1.9 <sup>+++</sup>          | 48.1 ± 4.3 <sup>***</sup>   | 3637.2 ± 77.8                 | 1.6 ± 0.2                                               |
| 15%w/w TiO <sub>2</sub>        | 80.5 ± 3.1 <sup>+++</sup>          | 37.3 ± 5.2 <sup>+/***</sup> | 3559.9 ± 72.8                 | 1.5 ± 0.1                                               |
| 20%w/w TiO <sub>2</sub>        | 91.5 ± 2.3 <sup>**</sup>           | 37.0 ± 4.0 <sup>+/***</sup> | 3727.5 ± 156.3                | 1.4 ± 0.2                                               |
| 25% w/w TiO <sub>2</sub>       | 85.6 ± 3.6 <sup>+++</sup>          | 33.0 ± 4.1 <sup>+/***</sup> | 3894.5 ± 166.7 <sup>**</sup>  | 1.3 ± 0.2 <sup>*</sup>                                  |
| 5%w/w ZrO <sub>2</sub>         | 85.3 ± 0.8 <sup>+++</sup>          | 41.7 ± 5.2                  | 2993.0 ± 137.3                | 1.6 ± 0.2                                               |
| 10%w/w ZrO <sub>2</sub>        | 89.3 ± 2.0                         | 41.7 ± 5.2 <sup>***</sup>   | 3256.3 ± 167.4                | 1.7 ± 0.2                                               |
| 15%w/w ZrO <sub>2</sub>        | 86.7 ± 3.4 <sup>+++</sup>          | 44.2 ± 4.6 <sup>***</sup>   | 3341.5 ± 158.4                | 1.6 ± 0.2                                               |
| 20%w/w ZrO <sub>2</sub>        | 88.2 ± 1.4 <sup>++</sup>           | 47.7 ± 2.9 <sup>***</sup>   | 3343.8 ± 116.9                | 1.6 ± 0.2                                               |
| 25% w/w ZrO <sub>2</sub>       | 88.8 ± 1.6 <sup>+</sup>            | 42.2 ± 8.0 <sup>***</sup>   | 3471.8 ± 200.8                | 1.3 ± 0.3                                               |
| 10%w/w Silane TiO <sub>2</sub> | 106.0 ± 3.0 <sup>+++/***/†††</sup> | 42.2 ± 8.0 <sup>*</sup>     | 4338.0 ± 274.8 <sup>***</sup> | 1.7 ± 0.2                                               |
| 10%w/w Silane ZrO <sub>2</sub> | 96.5 ± 1.6 <sup>***/†</sup>        | 53.2 ± 1.6 <sup>***</sup>   | 3181.8 ± 91.2                 | 1.4 ± 0.2                                               |
| Cemex                          | 85.2 ± 4.2 <sup>+++</sup>          | 69.8 ± 7.8 <sup>***</sup>   | 3082.8 ± 204.6                | 1.2 ± 0.1 <sup>**</sup>                                 |
| Palacos R                      | 104.6 ± 2.9 <sup>+++/***</sup>     | 46.0 ± 6.5 <sup>++</sup>    | 3414.0 ± 123.2                | 2.5 ± 0.2                                               |

(++ p<0.05, +++ p<0.001 compared to 10% BaSO<sub>4</sub>; \* p<0.05, \*\* p<0.01, \*\*\*p<0.001 compared 0%w/w radiopacifier; † p<0.05, ††† p<0.001 compared to 10%w/w radiopacifier)

**Table S2** Average MC3T3 cell attachment and viability results with standard deviations for tested cement compositions.

| Sample                         | Attached cell density (cells/cm <sup>2</sup> ) |              |               | Absorbance (OD at 490nm)     |                                  |
|--------------------------------|------------------------------------------------|--------------|---------------|------------------------------|----------------------------------|
|                                | 1 hour                                         | 4 hours      | 24 hours      | 3 days                       | 7 days                           |
| 10%w/w BaSO <sub>4</sub>       | 4125 ± 44                                      | 5550 ± 1060  | 5150 ± 1031   | 0.082 ± 0.018                | 0.349 ± 0.01                     |
| 0%w/w radiopacifier            | 4100 ± 495                                     | 4850 ± 1106  | 4025 ± 1187   | 0.079 ± 0.025                | 0.325 ± 0.014                    |
| 10%w/w TiO <sub>2</sub>        | 4875 ± 287                                     | 5825 ± 409   | 7050 ± 727*   | 0.057 ± 0.028                | 0.334 ± 0.037                    |
| 10%w/w ZrO <sub>2</sub>        | 3625 ± 1130                                    | 5250 ± 856   | 5825 ± 1228   | 0.027 ± 0.022                | 0.296 ± 0.021                    |
| 10%w/w Silane TiO <sub>2</sub> | 6700 ± 732 <sup>++/**/†</sup>                  | 7725 ± 1604* | 7625 ± 1064** | 0.06 ± 0.027                 | 0.31 ± 0.019                     |
| 10%w/w Silane ZrO <sub>2</sub> | 4225 ± 767                                     | 5625 ± 750   | 6200 ± 729    | 0.003 ± 0.006 <sup>+/*</sup> | 0.202 ± 0.039 <sup>++/**/†</sup> |

(+ p<0.05, ++ p<0.01, +++ p<0.001 compared to 10% BaSO<sub>4</sub>; \* p<0.05, \*\* p<0.01 compared 0%w/w radiopacifier; † p<0.05 compared to 10%w/w radiopacifier)

**Table S3** Transmitted intensity values at 35 and 70keV

| Material  | Original Intensity, I <sub>0</sub> (keV) | Density, ρ (g cm <sup>-1</sup> ) | Mass attenuation coefficient, μ/ρ (cm <sup>2</sup> /g) | Linear attenuation coefficient, μ (cm <sup>-1</sup> ) | Material thickness, e (cm) | Transmitted Intensity, I (keV) |
|-----------|------------------------------------------|----------------------------------|--------------------------------------------------------|-------------------------------------------------------|----------------------------|--------------------------------|
| Barium    | 70                                       | 3.5                              | 5.1                                                    | 17.9                                                  | 1                          | 1.3 x 10 <sup>-06</sup>        |
|           | 35                                       |                                  | 6.9                                                    | 24.4                                                  |                            | 9.2 x 10 <sup>-10</sup>        |
| Titanium  | 70                                       | 4.5                              | 0.5                                                    | 2.3                                                   | 1                          | 7.9                            |
|           | 35                                       |                                  | 3.6                                                    | 16.2                                                  |                            | 3.3x10 <sup>-06</sup>          |
| Zirconium | 70                                       | 6.5                              | 2.2                                                    | 14.5                                                  | 1                          | 3.6x10 <sup>-05</sup>          |
|           | 35                                       |                                  | 18.1                                                   | 118.0                                                 |                            | 2.0x10 <sup>-50</sup>          |
| PMMA      | 70                                       | 1.18                             | 0.2                                                    | 0.2                                                   | 1                          | 60.7                           |
|           | 35                                       |                                  | 0.3                                                    | 0.3                                                   |                            | 25.5                           |
